# Supplementary material
Source: Springer Nature journal article supplement (https://www.springermedizin.de/resource/supplementary/13063_2007_206_MOESM8_ESM.pdf/9622294)

# Hazard Ratio (95% confidence interval)

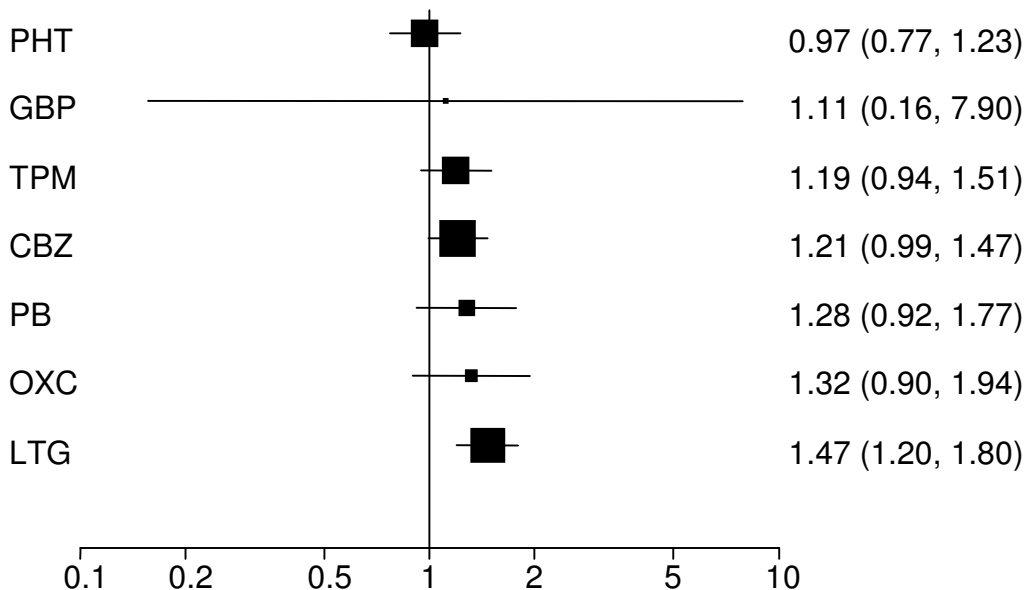

HR<1 VPA worse

HR>1 VPA better

Supplement: MOESM8 [file 9622294]
